# Comparison of Deep Learning Approaches for Conversion of International Classification of Diseases Codes to the Abbreviated Injury Scale

**Ayush Doshi<sup>1</sup>, Charbel Marche<sup>1</sup>, Pavel Chernyavskiy<sup>2</sup>, George Glass<sup>3</sup>, and Thomas Hartka<sup>3\*</sup>**

<sup>1</sup>University of Virginia, School of Medicine, 200 Jeanette Lancaster Way, Charlottesville, VA 22905, United States

<sup>2</sup>University of Virginia, Department of Public Health, 1215 Lee St., Charlottesville, VA 22905, United States

<sup>3</sup>University of Virginia, Department of Emergency Medicine, 1215 Lee St., Charlottesville, VA 22905, United States

\*Corresponding Author: [trh6u@uvahealth.org](mailto:trh6u@uvahealth.org)

## ABSTRACT

The injury severity classifications generated from the Abbreviated Injury Scale (AIS) provide information that allows for standardized comparisons in the field of trauma injury research. However, the majority of injuries are coded in International Classification of Diseases (ICD) and lack this severity information. A system to predict injury severity classifications from ICD codes would be beneficial as manually coding in AIS can be time-intensive or even impossible for some retrospective cases. It has been previously shown that the encoder-decoder-based neural machine translation (NMT) model is more accurate than a one-to-one mapping of ICD codes to AIS. The objective of this study is to compare the accuracy of two architectures, feedforward neural networks (FFNN) and NMT, in predicting Injury Severity Score (ISS) and  $ISS \geq 16$  classification. Both architectures were tested in direct conversion from ICD codes to ISS score and indirect conversion through AIS for a total of four models. Trauma cases from the U.S. National Trauma Data Bank were used to develop and test the four models as the injuries were coded in both ICD and AIS. 2,031,793 trauma cases from 2017-2018 were used to train and validate the models while 1,091,792 cases from 2019 were used to test and compare them. The results showed that indirect conversion through AIS using an NMT was the most accurate in predicting the exact ISS score, followed by direct conversion with FFNN, direct conversion with NMT, and lastly indirect conversion with FFNN, with statistically significant differences in performance on all pairwise comparisons. The rankings were similar when comparing the accuracy of predicting  $ISS \geq 16$  classification, however the differences were smaller. The NMT architecture continues to demonstrate notable accuracy in predicting exact ISS scores, but a simpler FFNN approach may be preferred in specific situations, such as if only  $ISS \geq 16$  classification is needed or large-scale computational resources are unavailable.

# 1 INTRODUCTION

1 Injury severity scores have an important role in trauma injury epidemiology and surveillance  
2 research. As part of the Abbreviated Injury Scale (AIS), an anatomy-based coding system developed  
3 specifically for trauma injury documentation, the severity designations built into the AIS codes allow for  
4 more objective inferences and comparisons to be made for a given set of injuries<sup>1</sup>. Furthermore, several  
5 methods have been proposed to produce a clinically significant, global severity score that encompasses  
6 multiple injuries using these severity designations. Two common approaches used to acquire this  
7 representative index are the Maximum Abbreviated Injury Scale (MAIS) and the Injury Severity Scale (ISS)  
8 methods. The MAIS approach utilizes the highest severity designation for a given set of injuries as the  
9 representative index and is frequently used by the National Highway Traffic Safety Administration to  
10 evaluate their projects as part of their MAIS-based costs system<sup>2,3</sup>. The ISS method aggregates the  
11 highest severity designations from a maximum of three distinct body regions into a 75-point system  
12 and has become the gold-standard for injury severity quantification<sup>4,5</sup>.

13 However, the majority of medical data, including visits for trauma injuries, are coded using the  
14 International Classification of Diseases (ICD) due to it often being required for billing and  
15 reimbursement. Although ICD provides a relatively easy-to-use framework for classifying a wide breadth  
16 of diseases and procedures with good inter-operator consistency, a notable downside of this  
17 classification system is the lack of associated injury severity designations. This is particularly important to  
18 trauma research as it then requires non-standardized inferences to be made about the severity of an  
19 injury based on its mechanism and connections with other injury codes<sup>6</sup>. Given the need for  
20 standardized severity metrics for trauma research and that manual AIS coding of injuries for severity  
21 designations alone is often prohibitively time-intensive or impossible in some retrospective cases, an  
22 automated system to obtain injury severity information using ICD codes is important.

23 Several methods to facilitate and simplify the conversion of ICD to ISS currently exist. Supported  
24 by the organization that maintains AIS, the Association for the Advancement of Automotive Medicine  
25 (AAAM), Loftis et al. in 2016 developed the latest official ICD to AIS body region-severity mappings that  
26 bridge ICD9 and ICD10 to AIS 2005 with the 2008 update<sup>7</sup>. In 2010, Clark et al. released a Stata  
27 module, ICDPIC, that allowed for the conversion of ICD-9 codes to AIS body region-severity pairs<sup>8</sup>. The  
28 module was then ported into R as ICDPIC-R in 2018 and updated to include ICD-10<sup>9</sup>. More recently in  
29 2023, Hartka et al. developed a neural machine translation-based tool that allowed for the conversion of  
30 ICD10 to full AIS 2005 with 2008 update codes using the National Trauma Data Bank<sup>10</sup>. This NMT  
31 model showed improved accuracy compared to the official AAAM map and ICDPIC(-R) methods,  
32 especially for major trauma defined by an ISS  $\geq 16$ . However, these methods generally fall short in several  
33 metrics. Studies analyzing the 1:1 translation accuracy of the official AAAM mappings compared to

34 manual coding by certified AIS coders demonstrated moderate accuracy ranging from 70-82% and poor  
35 inter-operator agreement as low as 48%<sup>11-13</sup>. Studies evaluating the accuracy of ISS scores calculated  
36 from ICD codes converted using ICDPIC-R demonstrated an overall accuracy of 17.7%<sup>10,14</sup>. Finally, all  
37 three methods of ICD to ISS score conversion globally underestimate the ISS score compared to those  
38 calculated from manually-coded AIS codes<sup>10,13,14</sup>.

39 The results from the NMT approach indicate that deep learning is a promising technology for ICD  
40 to ISS conversion. However, the use of an NMT to first convert ICD codes to AIS codes and then calculate  
41 the ISS score from the converted AIS codes may be more complex than necessary. The goal of this study  
42 was to compare the performance of the simpler feed-forward neural network (FFNN) architecture to the  
43 performance of the more complex NMT architecture in predicting severity information, as well as  
44 determine if there is an advantage in direct prediction from ICD codes compared to indirect prediction  
45 through AIS.

## 2 METHODS

46 This study compared two different machine learning architectures, FFNN and NMT, using two  
47 different model structures for each, direct conversion from ICD to ISS and indirect conversion through  
48 AIS. These models were trained and tested using data from the U.S. National Trauma Data Bank (NTDB).

### 2.1 Datasets

49 The NTDB is a dataset managed by the American College of Surgeons that contains trauma injury  
50 cases reported from every Level-I, Level-II, and Level-III trauma center in the United States as part of their  
51 credentialing requirement. Specifically, the dataset covers trauma injury cases where the patient either  
52 was admitted to the hospital or died in the emergency department. Although Level-IV, Level-V, and  
53 community hospitals are not required to report injury cases, they are able to do so voluntarily.

54 Every case in the NTDB contains demographic information about the patient, the mechanism of  
55 initial injury, procedures, diagnoses, and outcomes. The patient's age, sex, and co-morbidities are  
56 included in the demographics. The initial mechanism of injury is reported using ICD external-cause  
57 codes (E-codes) while any procedures that were performed are reported using ICD procedures codes  
58 (P-codes). The diagnoses were double coded in both ICD and AIS manually by trained registrars  
59 certified in both systems. Double manual coding provides the current gold-standard data for ICD to AIS  
60 and thereby ICD to ISS conversions. It has been used to test other conversion models, including AAAM's  
61 official ICD to AIS mappings<sup>10,13</sup>.

62 NTDB data from 2017-2018 was used to train and validate the models while data from 2019 was  
63 used to test them. During these selected years, the diagnoses for a given case were reported using both  
64 ICD-10 and AIS 2005 with 2008 update. The 2,031,793 trauma cases from 2017-2018 were pooled

65 together and randomly assigned to training and validation datasets at a 90%-10% ratio, resulting in  
66 1,828,613 being used for training and 203,180 cases being used for validation. The testing dataset  
67 comprised all 1,091,792 trauma cases from 2019. Data from a separate year was chosen for testing to  
68 account for any minor inter-year changes in coding practices.

## 2.2 Outcomes of interest

69 The two primary outcomes of interest for this study were exact ISS score prediction and  $ISS \geq 16$   
70 classification accuracy.  $ISS \geq 16$  is a commonly used cutoff for classifying a patient as severely injured  
71 based on mortality rates identified in the Major Trauma Outcome Study<sup>15,16</sup>. The gold standards used to  
72 assess model performance were the ISS score and  $ISS \geq 16$  classification calculated from the  
73 corresponding manually coded AIS codes. Sensitivity and specificity were reported alongside  $ISS \geq 16$   
74 classification prediction accuracy due to it being an imbalanced metric within the dataset with most  
75 cases failing to meet criteria. Further subpopulation sensitivity and specificity analysis were performed  
76 on  $ISS \geq 16$  classification performance stratified by sex and age.

77 The secondary outcomes of interest were  $MAIS \geq 3$  classification prediction accuracy and the  
78 percent of all predicted AIS codes that were correct. A predicted AIS code was considered correct if it  
79 either exactly matched a manually coded AIS code or shared both body region and severity with one.  
80 These secondary outcomes were only performed on indirect models given their intermediate AIS  
81 prediction step, which is skipped in direct models.

## 2.3 FFNN models

82 The two FFNNs developed for this study were built using the PyTorch framework, which is an open-  
83 source, machine-learning framework based on the tensor library Torch. Both the direct and indirect FFNN  
84 models contained a parametric rectified linear unit (PReLU) layer between two linear transformation layers  
85 that were initialized using the Kaiming uniform method<sup>17</sup>. The initial value for the PReLU layer was 0.25.  
86 The output function for the multiclass classifier, the direct FFNN, was a LogSoftmax layer while the output  
87 function for the multilabel classifier, the indirect FFNN, was a Sigmoid layer. Weights were adjusted using  
88 an Adagrad optimizer with an initial  $\beta_1$  and  $\beta_2$  of 0.9 and 0.98, respectively. The initial learning rate was  
89 0.01 with a decay factor of 5 for every two consecutive un-improving epochs and an early stop condition  
90 of 10 decays. A negative log likelihood loss function was used during training of the direct FFNN while a  
91 binary cross entropy loss function was used for the indirect FFNN.

92 As input for the FFNN models, every age and sex demographic, E-code, P-codes, and ICD-10  
93 diagnosis code present in the dataset were combined and transformed into a binary dummy variable  
94 system. Each trauma case was then converted into a sparse binary tensor of these dummy variables,  
95 which were used as input for both the direct and indirect models. A similar system was used for the  
96 outputs, with every possible ISS score being converted to a dummy variable system for the direct FFNN

97 and every AIS code being used for the indirect FFNN. However, the method for selecting the predictions  
98 from the output tensor differed between the direct and indirect structures. The ISS dummy variable with  
99 the largest predicted score from the LogSoftmax layer was chosen for the direct structured model while  
100 any AIS dummy variable with a predicted score greater than 0.3 from the sigmoid layer was selected for  
101 the indirect structured model.

## 2.4 NMT models

102 The two NMTs developed for this study were built using the PyTorch implementation of OpenNMT,  
103 an open-source toolkit developed to research NMTs and perform competitively. The NMT models were  
104 based on the Transformer architecture published by the Google Brain team<sup>18</sup>. Eight attention heads with  
105 a dropout of 0.1 were used and the encoder-decoder stacks contained six identical, 512-unit layers. Each  
106 encoder layer contained a multi-head self-attention mechanism followed by a position-wise FFNN and  
107 layer normalization. Each decoder layer contained a masked multi-head attention mechanism followed by  
108 a similar multi-head self-attention and FFNN mechanisms as the encoder layers. Weights were adjusted  
109 using an Adam optimizer with an initial  $\beta_1$  and  $\beta_2$  of 0.9 and 0.998, respectively, and an initial learning  
110 rate of 2. The learning rate decay was proportional to the inverse square root of the step number and a  
111 categorical cross-entropy loss function was used for training.

112 The input for the NMT models were sentences generated by concatenating the age and sex of the  
113 patient, the E-code, any P-codes, and the ICD-10 diagnosis codes for each trauma case into a  
114 space-separated string without periods. These sentences were used as input for both the direct and  
115 indirect NMT models. The age, P-codes, and ICD diagnosis codes were prefixed with an A, P, and D,  
116 respectively, to separate them in the vocabulary structure generated by the model as well as increase  
117 readability when examining attention results. The output sentences differed between the direct and  
118 indirect structures. For the direct structure, the output sentence was only the ISS score. For the indirect  
119 structure, the output sentence was a space-separated string of AIS codes without the severity  
120 designation arranged in ascending numerical order.

## 2.5 Testing and comparing the models

121 Predicted ISS scores and ISS  $\geq 16$  classifications were generated for the testing dataset using the  
122 four models and were compared to expected scores and classifications from the databank. Accuracies for  
123 correctly predicting the exact ISS scores and ISS  $\geq 16$  classifications were calculated for the four models  
124 and compared to one another. The statistical significance of the differences in performance were tested  
125 using Cochran's Q test followed by post-hoc pairwise McNemar tests. Root mean squared error (RMSE)  
126 was used to further compare the four models in predicting exact ISS scores while sensitivity and specificity  
127 analysis was performed on the ISS  $\geq 16$  classification results. Additional subpopulation sensitivity and  
128 specificity analysis were performed after stratifying for both sex and age, with age being binned into 0-

129 17, 18-64, and 65+ year groups.

130 For the secondary outcomes, the predicted MAIS  $\geq 3$  classifications for the two indirect models were  
131 compared against the expected MAIS  $\geq 3$  classifications. The statistical significance of the difference in  
132 performance was tested through a McNemar test. The quality of the AIS code predictions were analyzed  
133 by calculating the percentage of predicted codes that either exactly matched or shared the same body  
134 region and severity with an expected code. This percentage was calculated from the union set of both  
135 predicted and expected codes for each case. Statistical differences between the two sets of percentages  
136 were then compared using the Wilcoxon signed-rank test and effect size was reported as the pseudo-  
137 median difference.

### 3 RESULTS

#### 3.1 Model training and testing

138 The demographic and injury statistics for the training, validation, and testing datasets are shown  
139 in [Table 1](#). The number of injuries per patient, the distribution of ISS scores, and the percentage of MAIS  
140  $\geq 3$  classifications were similar across the three datasets. However, the testing dataset had a slightly  
141 older population with more incidence of falls, less male predominance, and a lower prevalence of ISS  
142  $\geq 16$  classifications compared to the training and validation datasets. Yet, given that the testing dataset  
143 was obtained from a different year to allow for robustness testing against inter-year differences, some  
144 variation in the distributions was expected.

145 Training and testing durations for the four models are shown in [Table 2](#). Testing was performed  
146 twice, once with a CUDA-enabled GPU and once without it. Both training and GPU-inclusive testing  
147 were performed on a computing cluster with an allocation of four standard processing nodes, 60 GB of  
148 RAM, and an NVIDIA A100 80GB VRAM Tensor Core GPU. CPU-only testing was performed on a  
149 computer cluster with similar four processing nodes but without a GPU allocation. Furthermore, the  
150 RAM size requirements differed between the FFNN and NMT models for the CPU-only testing. The FFNN  
151 models were able to convert ICD codes with a smaller 8 GB RAM allocation while the NMT models  
152 required a larger 32 GB of RAM. Conversion outputs for both GPU-inclusive and CPU-only testing were  
153 identical.

**Table 1:** Demographic and injury statistics of the patients in the training, validation, and testing datasets.

|                                               | Training Dataset | Validation Dataset | Testing Dataset |
|-----------------------------------------------|------------------|--------------------|-----------------|
| Years                                         | 2017 - 2018      |                    | 2019            |
| Total number of patients                      | 1,828,613        | 203,180            | 1,091,792       |
| Number of injuries per patient (Median [IQR]) | 2 [1-4]          | 2 [1-4]            | 2 [1-4]         |
| Age in years (Median [IQR])                   | 47 [23-68]       | 47 [23-68]         | 49 [24-70]      |
| Males (Percentage)                            | 59.71%           | 59.61%             | 58.90%          |
| Mechanism of Injury (Percentage)              |                  |                    |                 |
| Falls                                         | 46.6%            | 46.5%              | 49.2%           |
| Automotive-related                            | 32.2%            | 32.2%              | 30.3%           |
| Assault                                       | 9.2%             | 9.2%               | 8.5%            |
| Self-injury                                   | 1.3%             | 1.2%               | 1.4%            |
| Other                                         | 10.7%            | 10.7%              | 10.6%           |
| ISS (Median [IQR])                            | 8 [4-10]         | 8 [4-10]           | 8 [4-10]        |
| ISS $\geq$ 16 (Percentage)                    | 15.8%            | 15.7%              | 15.2%           |
| MAIS $\geq$ 3 (Percentage)                    | 31.0%            | 31.1%              | 31.3%           |

**Table 2:** Training and testing durations of the four models.

|                         | Computation Times |                  |                  |                  |
|-------------------------|-------------------|------------------|------------------|------------------|
|                         | Direct FFNN       | Indirect FFNN    | Direct NMT       | Indirect NMT     |
| Training                | 11 hrs., 10 mins  | 11 hrs., 22 mins | 12 hrs., 27 mins | 14 hrs., 34 mins |
| Testing (GPU-inclusive) | 1 min, 6 s        | 1 min, 24 s      | 69 min, 10 s     | 82 mins, 53 s    |
| Testing (CPU-only)      | 62 min, 7 s       | 97 min, 2 s      | 251 min, 32 s    | 307 min, 19 s    |

### 3.2 Accuracy in exact ISS score prediction

154 The first primary outcome of interest was the accuracy of the four models in predicting the exact  
155 ISS score. As shown in [Table 3](#), the indirect NMT model continued to perform the best with an accuracy  
156 of 79.8%, followed by the direct FFNN (76.5%), direct NMT (75.9%), and indirect FFNN (74.3%) models.  
157 Cochran's Q testing followed by post-hoc pairwise McNemar testing without continuity correction  
158 demonstrated that the differences in performance between each pairwise combination were statistically  
159 significant ([Table 4](#)). When comparing RMSE, the two NMT models demonstrated smaller overall errors  
160 than the two FFNN models ([Table 3](#)). Furthermore, the relative rankings of the direct FFNN and direct  
161 NMT models' performance using RMSE was discordant with their respective rankings when using  
162 accuracy, with the overall less accurate direct NMT model demonstrating smaller average errors than the

163 overall more accurate direct FFNN.

**Table 3:** Performance in exact ISS score prediction for the four tested models. Accuracy was measured by comparing the predicted testing dataset ISS scores for each model to the expected ISS scores in the NTDB. RMSE was calculated for each model using the differences between the predicted and expected scores.

|                        | Exact ISS Score |                         |
|------------------------|-----------------|-------------------------|
|                        | Accuracy        | Root Mean Squared Error |
| Direct (to ISS) FFNN   | 76.5%           | 4.06                    |
| Indirect (to AIS) FFNN | 74.3%           | 4.51                    |
| Direct (to ISS) NMT    | 75.9%           | 3.83                    |
| Indirect (to AIS) NMT  | 79.8%           | 3.77                    |

**Table 4:** McNemar statistics and associated adjusted *p-values* from each post-hoc pairwise McNemar test on exact ISS score prediction performance. Differences between all pairwise combinations were found to be statistically significant.

|                        | Direct (to ISS) FFNN           | Indirect (to AIS) FFNN          | Direct (to ISS) NMT             |
|------------------------|--------------------------------|---------------------------------|---------------------------------|
| Indirect (to AIS) FFNN | 3,530 [ $<1 \times 10^{-99}$ ] | —                               | —                               |
| Direct (to ISS) NMT    | 294 [ $7.36 \times 10^{-66}$ ] | 1,785 [ $<1 \times 10^{-99}$ ]  | —                               |
| Indirect (to AIS) NMT  | 9,806 [ $<1 \times 10^{-99}$ ] | 24,311 [ $<1 \times 10^{-99}$ ] | 12,439 [ $<1 \times 10^{-99}$ ] |

### 3.3 Accuracy in ISS $\geq 16$ classification prediction

164 The secondary primary outcome of interest was the accuracy of the four models in predicting the  
 165 ISS  $\geq 16$  classification. Similar rankings were seen in ISS  $\geq 16$  classification performance compared to  
 166 exact ISS score performance, with the indirect NMT model continuing to have the best accuracy for ISS  
 167  $\geq 16$  classification (94.0%), followed by the direct FFNN (93.4%), direct NMT (93.1%), and indirect FFNN  
 168 (93.1%) models (Table 5). Similar Cochran's Q and post-hoc pairwise McNemar testing demonstrated that  
 169 the differences in performance between each pairwise combination was statistically significant except  
 170 for the direct NMT and indirect FFNN comparison (Table 6). On global sensitivity and specificity analysis,  
 171 all four models had similarly high specificity; however, the NMT models demonstrated superior sensitivity  
 172 against the FFNN models overall.



**Table 5:** Performance in ISS  $\geq 16$  classification for the four tested models. Accuracy, sensitivity, and specificity were measured by comparing the predicted testing dataset ISS  $\geq 16$  classifications for each model to the expected ISS  $\geq 16$  classifications from the reported ISS scores in the NTDB.

|                        | ISS $\geq 16$ Classification |             |             |
|------------------------|------------------------------|-------------|-------------|
|                        | Accuracy                     | Sensitivity | Specificity |
| Direct (to ISS) FFNN   | 93.4%                        | 65.1%       | 97.6%       |
| Indirect (to AIS) FFNN | 93.1%                        | 66.3%       | 97.8%       |
| Direct (to ISS) NMT    | 93.1%                        | 72.2%       | 96.8%       |
| Indirect (to AIS) NMT  | 94.0%                        | 74.9%       | 97.4%       |

**Table 6:** McNemar statistics and associated adjusted *p-values* from each post-hoc pairwise McNemar test on ISS  $\geq 16$  classification performance. Differences between all pairwise combinations were found to be statistically significant except for the direct NMT model and indirect FFNN model comparison.

|                        | Direct (to ISS) FFNN           | Indirect (to AIS) FFNN         | Direct (to ISS) NMT            |
|------------------------|--------------------------------|--------------------------------|--------------------------------|
| Indirect (to AIS) FFNN | 220 [ $2.56 \times 10^{-49}$ ] | —                              | —                              |
| Direct (to ISS) NMT    | 193 [ $1.72 \times 10^{-43}$ ] | 0.708 [0.4]                    | —                              |
| Indirect (to AIS) NMT  | 867 [ $<1 \times 10^{-99}$ ]   | 1,846 [ $<1 \times 10^{-99}$ ] | 1,608 [ $<1 \times 10^{-99}$ ] |

173 [Table 7](#) and [Table 8](#) show the results from the subpopulation-stratified sensitivity and specificity  
174 analyses on the performance of the four models based on sex and age groupings, respectively. Each of  
175 the four models demonstrated consistently similar specificities across all sex and age subpopulations  
176 compared to its global specificity. However, large variations were seen across the subpopulations on  
177 sensitivity analysis. When stratified by sex, all models had a higher sensitivity for the male subgroup than  
178 their global sensitivity along with the respective inverse for the female subgroup ([Table 7](#)). The  
179 performance rankings of the models on sensitivity mirrored that of the global sensitivity rankings, with  
180 the NMT models outperforming the FFNN models. Furthermore, the NMT models demonstrated smaller  
181 differences between the male and female subgroups than the FFNN models while the indirect models  
182 demonstrated higher sensitivities than their respective direct models. When stratified by age grouping,  
183 analogous patterns in the sensitivity variations to that of the sex-stratified analysis was observed. For all  
184 models, the 18-64 year group demonstrated the highest sensitivity and was greater than each model's  
185 respective global sensitivity ([Table 8](#)). Inversely, both the 0-17 and 65+ year groups underperformed in  
186 sensitivity compared to their respective global sensitivity, with the 65+ year group demonstrating the  
187 lowest sensitivity for all age-group-stratified subgroups across all models. The NMT models' sensitivities  
188 were overall larger than that of the FFNN models', which is consistent with patterns seen on the global  
189 analysis. Additionally, the indirect models continued to demonstrate higher sensitivities than their  
190 respective direct models.

**Table 7:** Sex-stratified subpopulation sensitivity and specificity analysis of the ISS  $\geq 16$  classification performance for the four models.

|                        | ISS $\geq 16$ Classification by Sex |             |             |             |
|------------------------|-------------------------------------|-------------|-------------|-------------|
|                        | Males                               |             | Females     |             |
|                        | Sensitivity                         | Specificity | Sensitivity | Specificity |
| Direct (to ISS) FFNN   | 66.2%                               | 97.5%       | 62.8%       | 97.8%       |
| Indirect (to AIS) FFNN | 67.2%                               | 97.7%       | 64.4%       | 97.9%       |
| Direct (to ISS) NMT    | 73.2%                               | 96.7%       | 69.9%       | 96.9%       |
| Indirect (to AIS) NMT  | 75.3%                               | 97.3%       | 74.1%       | 97.5%       |

**Table 8:** Age-group-stratified subpopulation sensitivity and specificity analysis of the ISS  $\geq 16$  classification performance for the four models.

|                        | ISS $\geq 16$ Classification by Age Group |             |              |             |             |             |
|------------------------|-------------------------------------------|-------------|--------------|-------------|-------------|-------------|
|                        | 0 - 17 yrs.                               |             | 18 - 64 yrs. |             | 65+ yrs.    |             |
|                        | Sensitivity                               | Specificity | Sensitivity  | Specificity | Sensitivity | Specificity |
| Direct (to ISS) FFNN   | 62.2%                                     | 97.9%       | 69.2%        | 97.4%       | 58.1%       | 97.7%       |
| Indirect (to AIS) FFNN | 62.1%                                     | 98.2%       | 69.8%        | 97.6%       | 60.9%       | 97.7%       |
| Direct (to ISS) NMT    | 68.7%                                     | 97.1%       | 76.6%        | 96.6%       | 64.8%       | 96.9%       |
| Indirect (to AIS) NMT  | 73.3%                                     | 97.6%       | 77.1%        | 97.5%       | 71.1%       | 97.1%       |

### 3.4 Accuracy in MAIS $\geq 3$ classification and AIS code prediction

191 The two secondary outcomes of interest were the MAIS  $\geq 3$  classification and AIS code prediction  
 192 accuracy for the two indirect models. The two direct models were not included in these comparisons as  
 193 they both directly predicted ISS scores without predicting AIS codes as an intermediary step. The  
 194 indirect NMT model was more accurate than the indirect FFNN model in predicting MAIS  $\geq 3$   
 195 classifications at 94.0% and 91.8%, respectively (Table 9). McNemar testing demonstrated a statistically  
 196 significant difference in the accuracy of the two models with a *p-value* of  $<1 \times 10^{-99}$ . Furthermore, the  
 197 indirect NMT model predicted correct AIS codes at a higher percentage than the indirect FFNN model at  
 198 88.3% and 79.6% respectively. Wilcoxon signed rank testing of the two paired sets of percentages  
 199 demonstrated a statistically significant pseudo-median difference of 21% for the two non-parametric  
 200 distributions with a *p-value* of  $<1 \times 10^{-99}$ .

**Table 9:** Performance in MAIS  $\geq 3$  classification for the two indirect models. Accuracy, sensitivity, and specificity were measured by comparing the predicted testing dataset MAIS  $\geq 3$  classifications for each model to the expected MAIS  $\geq 3$  classifications from the reported AIS codes in the NTDB.

|                        | MAIS $\geq 3$ Classification |             |             |
|------------------------|------------------------------|-------------|-------------|
|                        | Accuracy                     | Sensitivity | Specificity |
| Indirect (to AIS) FFNN | 91.8%                        | 88.7%       | 94.33%      |
| Indirect (to AIS) NMT  | 94.0%                        | 93.9%       | 94.0%       |

## 4 DISCUSSION

201 In this study, three newly proposed machine learning models, direct FFNN, indirect FFNN, and  
 202 direct NMT, were compared against the previously proposed indirect NMT model in predicting injury  
 203 severity scores and classifications from ICD-10 codes. The indirect NMT model was found to notably  
 204 outperform the other models in predicting the exact ISS score, but demonstrated only marginal  
 205 improvement over them in predicting ISS  $\geq 16$  and MAIS  $\geq 3$  classifications based on accuracy.  
 206 Furthermore, the NMT and FFNN architectures demonstrated similarly high specificities in binary  
 207 classification tests, but the NMT models were more sensitive across the board in those same metrics.

### 4.1 FFNN models vs NMT models

208 The results of this study demonstrate that there exist different, viable applications of deep learning  
 209 in acquiring standardized injury severity data from cases only coded using the ICD-10 system. While  
 210 manual coding by certified experts will continue to remain the gold standard for acquiring injury severity  
 211 information, the option to generate it in situations where manual AIS coding is either impractical or  
 212 impossible would be a powerful tool in the field of injury research. Although the previously proposed  
 213 indirect NMT model provided the most accurate injury information overall, the simpler FFNN models  
 214 could be used instead in specific situations.

215 In predicting the exact ISS score and severity classification, both the FFNN and NMT models  
 216 performed similarly well in terms of accuracy, especially with ISS  $\geq 16$  classification. Furthermore, both  
 217 approaches were equally specific in accurately predicting binary classification results. However, the NMT  
 218 models generated smaller errors in aggregate compared to the FFNN models based on the RMSE.  
 219 Similar distinctions are seen with both ISS  $\geq 16$  and MAIS  $\geq 3$  classification, as the NMT models  
 220 demonstrated higher sensitivities than the FFNN models, including on subpopulation analysis. Though  
 221 the exact cause of this stratification is unclear, a potential explanation is that the FFNN approach is not  
 222 as strongly generating associations during the training process due to data sparseness, even when using  
 223 an appropriate Adagrad optimizer. This results in muddying the decisiveness of the prediction, both in  
 224 not meeting the 0.3 prediction score cutoff criteria for the multilabel indirect model as well as not

225 generating distinct predictions for the multiclass direct model. On the other hand, the multiple  
226 multi-head attention and feedforward layers comprising the encoder-decoder structure of the NMT  
227 lends itself to faster and more decisiveness learning from sparse data given its development initially for  
228 language translation<sup>18</sup>. This shortcoming of the FFNN results in an overall underscoring of ISS in the  
229 direct FFNN case or predicting fewer AIS codes and thereby underestimating the ISS score in the  
230 indirect FFNN case. This distinction is further supported through the comparison of the indirect FFNN  
231 and indirect NMT models in their AIS code prediction accuracy, with the indirect NMT significantly  
232 outperforming the indirect FFNN.

233 The other important practical difference between the FFNN and NMT architectures is the  
234 significantly shorter conversion time of the FFNN models compared to the NMT models. This difference  
235 is understandable given that the FFNN architecture is significantly smaller with only 4 layers compared  
236 to the much larger NMT architecture using multiple encoder-decoder units. In situations with limited  
237 computational resources with respect to both power and space, the smaller FFNN model may be  
238 preferable or even the only viable option. This is demonstrated with the NMT models requiring at least  
239 32 GB of RAM compared to the 8 GB of RAM required by the FFNN models during CPU-only testing.  
240 Additionally, although the FFNN models are outperformed by the NMT models on key metrics, both  
241 FFNN models outperformed other known options for calculating ISS, namely the official AAAM mapping  
242 and ICDPIC-R<sup>10</sup>.

## 4.2 Direct (ICD to ISS) vs indirect (ICD to AIS to ISS) approaches

243 Comparison of models' performance stratified by direct or indirect approach demonstrated a  
244 statistically significant, but clinically insignificant, difference. For both the FFNN models and the NMT  
245 models, the use of either a direct or indirect approach resulted in similar accuracies, sensitivities, and  
246 specificities. Furthermore, no consistency was found in the relative performance of the direct versus the  
247 indirect models. The direct approach outperformed the indirect approach when using a FFNN  
248 architecture while the inverse was found when using a NMT architecture. The most notable difference  
249 between the two approaches arises from computation times, as the direct models were slightly faster in  
250 conversion compared to their respective indirect counterparts. However, the reduction in computation  
251 time is significantly smaller than the computation time differences between the FFNN and NMT models.

## 4.3 Study strengths

252 The main strengths of this study were the two-by-two comparisons of architectures and  
253 approaches, the large sample size of the datasets, and the robustness of the testing data. By performing  
254 a two-by-two comparison using the four different approach-architecture pairs, distinctions and  
255 inferences could be made about the effects the model architecture or approach independently had on  
256 the accuracy of its estimations. Additionally, the large sample size from the NTDB provided enough

257 cases to both adequately train the models and help counteract the effects of each individual code's  
258 relative sparseness in the database. Furthermore, the large sample size of testing dataset helped  
259 increased the power of the study. Finally, by using a different year for the testing dataset compared to  
260 the training dataset, the models' robustness against expected, small inter-year variability in coding  
261 practice would also be assessed.

#### 4.4 Study limitations

262 There are several important limitations to consider for this study. First, it is unknown whether the  
263 layers and structures used for the models are the most optimal. Given both the stochastic nature of  
264 training a deep learning model as well as the variety of layers, activation functions, and sizes that can be  
265 combinatorially used, it is impossible to know where the true global maximum in performance lies.  
266 Furthermore, the cutoff used for the indirect FFNN of 0.3 was chosen through analysis of the model's  
267 performance on the testing dataset with the goal of maximizing accuracy. However, this cutoff may vary  
268 for different patient population as the *a priori* probability of a given AIS code will be different. Second,  
269 the limitations of the NTDB are propagated into this study from its use. Namely, given the higher acuity  
270 population that constitutes the NTDB due to how cases are submitted, it is unknown how the  
271 differences in model performance will change in the setting of a lower acuity population. Further  
272 validation of these models will be needed to better understand the generalizability of these approaches.

## 5 CONCLUSIONS

273 A variety of deep learning model architectures and approaches can be used in the estimation of  
274 injury severity with varying levels of accuracy when the resources or data for manual coding with AIS is  
275 unavailable. The indirect NMT model demonstrated the best performance compared to the other three  
276 models overall; however, the other three models demonstrated similar efficacy in specific situations,  
277 namely for binary severity classifications with limited computational resources. In these situations, a less  
278 computationally intense and faster model may be preferable, especially for the conversions of larger  
279 datasets.

## 6 ACKNOWLEDGEMENTS

280 The authors would like to thank the National Trauma Data Bank (NTDB) for providing the data to  
281 perform this study. The content reproduced from the NTDB remains the full and exclusive copyrighted  
282 property of the American College of Surgeons. The American College of Surgeons is not responsible for  
283 any claims arising from works based on the original data, text, tables, or figures.

## 7 FUNDING

284            Research reported in this publication was supported by the National Center for Advancing  
285 Translational Sciences of the National Institutes of Health under the award number R03TR004015. The  
286 content is solely the responsibility of the authors and does not necessarily represent the official views of  
287 the National Institutes of Health.

## REFERENCES

- [1] Thomas A. Gennarelli and Elaine Wodzin. AIS 2005: a contemporary injury scale. *Injury*, 37(12):1083–1091, December 2006.
- [2] D. H. Wisner. History and current status of trauma scoring systems. *Archives of Surgery (Chicago, Ill.: 1960)*, 127(1):111–117, January 1992.
- [3] Lawrence Blincoe, Ted R. Miller, Jing-Shiarn Wang, David Swedler, Tristan Coughlin, Bruce Lawrence, Feng Guo, Sheila Klauer, and Thomas Dingus. The Economic and Societal Impact of Motor Vehicle Crashes, 2019 (Revised). NHTSA Technical Report DOT HS 813 403, National Highway Traffic Safety Administration, National Center for Statistics and Analysis, February 2023.
- [4] S. P. Baker, B. O'Neill, W. Haddon, and W. B. Long. The injury severity score: a method for describing patients with multiple injuries and evaluating emergency care. *The Journal of Trauma*, 14(3):187–196, March 1974.
- [5] R. Rutledge, D. B. Hoyt, A. B. Eastman, M. J. Sise, T. Velky, T. Canty, T. Wachtel, and T. M. Osler. Comparison of the Injury Severity Score and ICD-9 diagnosis codes as predictors of outcome in injury: analysis of 44,032 patients. *The Journal of Trauma*, 42(3):477–487; discussion 487–489, March 1997.
- [6] Juanita A. Haagsma, Nicholas Graetz, Ian Bolliger, Mohsen Naghavi, Hideki Higashi, Erin C. Mullany, Semaw Ferede Abera, Jerry Puthenpurakal Abraham, Koranteng Adofo, Ubai Alsharif, Emmanuel A. Ameh, Walid Ammar, Carl Abelardo T. Antonio, Lope H. Barrero, Tolesa Bekele, Dipan Bose, Alexandra Brazinova, Ferrán Catalá-López, Lalit Dandona, Rakhi Dandona, Paul I. Dargan, Diego De Leo, Louisa Degenhardt, Sarah Derrett, Samath D. Dharmaratne, Tim R. Driscoll, Leilei Duan, Sergey Petrovich Ermakov, Farshad Farzadfar, Valery L. Feigin, Richard C. Franklin, Belinda Gabbe, Richard A. Gosselin, Nima Hafezi-Nejad, Randah Ribhi Hamadeh, Martha Hijar, Guoqing Hu, Sudha P. Jayaraman, Guohong Jiang, Yousef Saleh Khader, Ejaz Ahmad Khan, Sanjay Krishnaswami, Chanda Kulkarni, Fiona E. Lecky, Ricky Leung, Raimundas Lunevicius, Ronan Anthony Lyons, Marek Majdan, Amanda J. Mason-Jones, Richard Matzopoulos, Peter A. Meaney, Wubegzier Mekonnen, Ted R. Miller, Charles N. Mock, Rosana E. Norman, Ricardo Orozco, Suzanne Polinder, Farshad Pourmalek, Vafa Rahimi-Movaghar, Amany Refaat, David Rojas-Rueda, Nobhojit Roy, David C. Schwebel, Amira Shaheen, Saeid Shahraz, Vegard Skirbekk, Kjetil Søreide, Sergey Soshnikov, Dan J. Stein, Bryan L. Sykes, Karen M. Tabb, Awoke Misganaw Temesgen, Eric Yeboah Tenkorang, Alice M. Theadom, Bach Xuan Tran, Tommi J. Vasankari, Monica S. Vavilala, Vasilij Victorovich Vlassov, Solomon Meseret Woldeyohannes, Paul Yip, Naohiro Yonemoto, Mustafa Z. Younis, Chuanhua Yu, Christopher J. L. Murray, and Theo Vos. The global burden of injury: incidence, mortality, disability-adjusted life years and time trends from the Global Burden of Disease study 2013. *Injury Prevention: Journal of the*

- International Society for Child and Adolescent Injury Prevention*, 22(1):3–18, February 2016.
- [7] Kathryn L. Loftis, Janet P. Price, Patrick J. Gillich, Kathy J. Cookman, Amy L. Brammer, Trish St Germain, Jo Barnes, Vickie Graymire, Donna A. Nayduch, Christine Read-Allsopp, Katherine Baus, Patsye A. Stanley, and Maureen Brennan. Development of an expert based ICD-9-CM and ICD-10-CM map to AIS 2005 update 2008. *Traffic Injury Prevention*, 17 Suppl 1:1–5, September 2016.
- [8] David E. Clark, Turner M. Osler, and David R. Hahn. ICDPIC: Stata module to provide methods for translating International Classification of Diseases (Ninth Revision) diagnosis codes into standard injury categories and/or scores. *Statistical Software Components*, October 2010. Publisher: Boston College Department of Economics.
- [9] David E. Clark, Adam W. Black, David H. Skavdahl, and Lee D. Hallagan. Open-access programs for injury categorization using ICD-9 or ICD-10. *Injury Epidemiology*, 5(1):11, April 2018.
- [10] Thomas Hartka, Pavel Chernyavskiy, George Glass, Justin Yaworsky, and Yangfeng Ji. Evaluation of Neural Machine translation for conversion of International Classification of disease codes to the Abbreviated injury Scale. *Accident; Analysis and Prevention*, 191:107183, October 2023.
- [11] Rebeca Abajas-Bustillo, Francisco José Amo-Setién, César Leal-Costa, María Del Carmen Ortego-Mate, María Seguí-Gómez, María Jesús Durá-Ros, and Mark R. Zonfrillo. Comparison of injury severity scores (ISS) obtained by manual coding versus "Two-step conversion" from ICD-9-CM. *PloS One*, 14(5):e0216206, 2019.
- [12] Barbara Haas, Wei Xiong, Maureen Brennan-Barnes, David Gomez, and Avery B. Nathens. Overcoming barriers to population-based injury research: development and validation of an ICD10-to-AIS algorithm. *Canadian Journal of Surgery. Journal Canadien De Chirurgie*, 55(1):21–26, February 2012.
- [13] Kimberly M. Glerum and Mark R. Zonfrillo. Validation of an ICD-9-CM and ICD-10-CM map to AIS 2005 Update 2008. *Injury Prevention: Journal of the International Society for Child and Adolescent Injury Prevention*, 25(2):90–92, April 2019.
- [14] Vivian Wan, Susheel Reddy, Arielle Thomas, Nabil Issa, Joseph Posluszny, Steven Schwulst, Michael Shapiro, Hasan Alam, Karl Y. Bilimoria, and Anne M. Stey. How does Injury Severity Score derived from International Classification of Diseases Programs for Injury Categorization using International Classification of Diseases, Tenth Revision, Clinical Modification codes perform compared with Injury Severity Score derived from Trauma Quality Improvement Program? *The Journal of Trauma and Acute Care Surgery*, 94(1):141–147, January 2023.
- [15] H. R. Champion, W. S. Copes, W. J. Sacco, M. M. Lawnick, S. L. Keast, L. W. Bain, M. E. Flanagan, and C. F. Frey. The Major Trauma Outcome Study: establishing national norms for trauma care. *The Journal of Trauma*, 30(11):1356–1365, November 1990.
- [16] Cameron Palmer. Major trauma and the injury severity score—where should we set the bar? *Annual Proceedings. Association for the Advancement of Automotive Medicine*, 51:13–29, 2007.



- [17] Kaiming He, Xiangyu Zhang, Shaoqing Ren, and Jian Sun. Delving Deep into Rectifiers: Surpassing Human-Level Performance on ImageNet Classification. *IEEE International Conference on Computer Vision (ICCV 2015)*, 1502, February 2015.
- [18] Ashish Vaswani, Noam Shazeer, Niki Parmar, Jakob Uszkoreit, Llion Jones, Aidan N Gomez, ukasz Kaiser, and Illia Polosukhin. Attention is All you Need. In I. Guyon, U. Von Luxburg, S. Bengio, H. Wallach, R. Fergus, S. Vishwanathan, and R. Garnett, editors, *Advances in Neural Information Processing Systems*, volume 30. Curran Associates, Inc., 2017.
